# Supplementary material for: Synthesis, Structure, and Characterizations of a Volatile/Soluble Heterometallic Hexanuclear Precursor [NaMn2(thd)4(OAc)]2
Source: MDPI journal article supplement (doi:10.3390/molecules28237795), 2023-11-27
Supplement: s1 [file s1]

## Supplementary Information

# **Synthesis, Structure, and Characterizations of a Volatile/Soluble Heterometallic Hexanuclear Precursor $[\text{NaMn}_2(\text{thd})_4(\text{OAc})]_2$**

Yuxuan Zhang , Zheng Wei , Evgeny V. Dikarev \*

## Table of Contents

|                                                                                         |   |
|-----------------------------------------------------------------------------------------|---|
| 1. Solid-State Structure of $[\text{NaMn}_2(\text{thd})_4(\text{OAc})]_2$ .....         | 3 |
| 2. IR Spectrum of $[\text{NaMn}_2(\text{thd})_4(\text{OAc})]_2$ .....                   | 7 |
| 3. $^1\text{H}$ NMR spectrum of $[\text{Na}(\text{thd})]$ .....                         | 8 |
| 4. Direct Analysis in Real Time (DART) Mass Spectrum of $[\text{Na}(\text{thd})]$ ..... | 9 |

## 1. Solid-State Structure of $[\text{NaMn}_2(\text{thd})_4(\text{OAc})_2]$

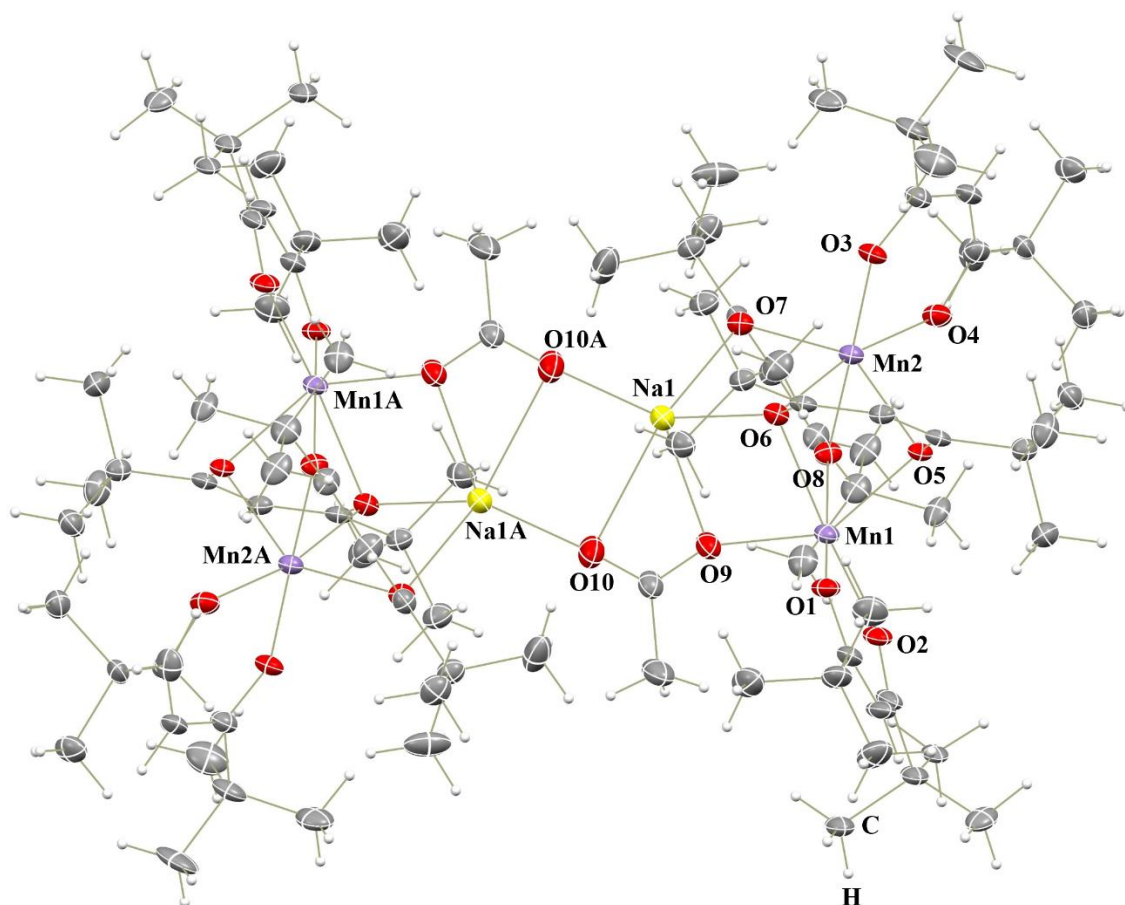

**Figure S1.** Molecular structure of the first crystallographically independent unit  $[\text{NaMn}_2(\text{thd})_4(\text{OAc})_2]$  (**1**). The Na, Mn, O, and C atoms are represented by thermal ellipsoids at the 30% probability level. Hydrogen atoms are shown as spheres of arbitrary radius.

**Table S1.** Bond Distances (Å) and Angles (°) in the Structure of the first crystallographically independent unit [NaMn<sub>2</sub>(thd)<sub>4</sub>(OAc)]<sub>2</sub> (**1**).

| Bond distances     |           |                 |            |                 |            |
|--------------------|-----------|-----------------|------------|-----------------|------------|
| Na(1)-O(6)**       | 2.329(2)  | Mn(1)-O(1)*     | 2.0699(19) | Mn(2)-O(3)*     | 2.0576(18) |
| Na(1)-O(7)**       | 2.357(2)  | Mn(1)-O(2)*     | 2.0671(19) | Mn(2)-O(4)*     | 2.0637(19) |
| Na(1)-O(9)**       | 2.338(2)  | Mn(1)-O(5)**    | 2.1807(17) | Mn(2)-O(5)**    | 2.2082(17) |
| Na(1)-O(10)**      | 2.635(2)  | Mn(1)-O(6)**    | 2.5077(18) | Mn(2)-O(6)**    | 2.2559(18) |
| Na(1)-O(10A)**     | 2.180(2)  | Mn(1)-O(8)**    | 2.1831(19) | Mn(2)-O(7)**    | 2.1324(18) |
|                    |           | Mn(1)-O(9)**    | 2.0829(19) | Mn(2)-O(8)**    | 2.1870(18) |
| Angles             |           |                 |            |                 |            |
| O(6)-Na(1)-O(7)    | 76.83(7)  | O(1)-Mn(1)-O(5) | 94.68(7)   | O(3)-Mn(2)-O(4) | 86.45(7)   |
| O(6)-Na(1)-O(9)    | 80.54(7)  | O(1)-Mn(1)-O(6) | 86.28(6)   | O(3)-Mn(2)-O(5) | 108.66(7)  |
| O(6)-Na(1)-O(10)   | 107.38(8) | O(1)-Mn(1)-O(8) | 167.63(7)  | O(3)-Mn(2)-O(6) | 96.66(7)   |
| O(7)-Na(1)-O(10)   | 160.11(8) | O(1)-Mn(1)-O(9) | 98.81(8)   | O(3)-Mn(2)-O(7) | 99.31(7)   |
| O(9)-Na(1)-O(7)    | 111.77(8) | O(2)-Mn(1)-O(1) | 86.31(8)   | O(3)-Mn(2)-O(8) | 173.97(7)  |
| O(9)-Na(1)-O(10)   | 51.66(7)  | O(2)-Mn(1)-O(5) | 108.41(7)  | O(4)-Mn(2)-O(5) | 96.47(7)   |
| O(10A)-Na(1)-O(6)  | 123.88(9) | O(2)-Mn(1)-O(6) | 171.23(7)  | O(4)-Mn(2)-O(6) | 168.35(7)  |
| O(10A)-Na(1)-O(7)  | 110.53(9) | O(2)-Mn(1)-O(8) | 104.84(8)  | O(4)-Mn(2)-O(7) | 107.56(8)  |
| O(10A)-Na(1)-O(9)  | 135.04(9) | O(2)-Mn(1)-O(9) | 104.19(8)  | O(4)-Mn(2)-O(8) | 89.52(7)   |
| O(10A)-Na(1)-O(10) | 83.70(9)  | O(5)-Mn(1)-O(6) | 67.56(6)   | O(5)-Mn(2)-O(6) | 71.90(6)   |
|                    |           | O(5)-Mn(1)-O(8) | 76.89(7)   | O(7)-Mn(2)-O(5) | 144.08(7)  |
|                    |           | O(8)-Mn(1)-O(6) | 82.14(6)   | O(7)-Mn(2)-O(6) | 83.08(7)   |
|                    |           | O(9)-Mn(1)-O(5) | 145.36(7)  | O(7)-Mn(2)-O(8) | 77.63(7)   |
|                    |           | O(9)-Mn(1)-O(6) | 81.60(7)   | O(8)-Mn(2)-O(5) | 76.24(6)   |
|                    |           | O(9)-Mn(1)-O(8) | 83.83(8)   | O(8)-Mn(2)-O(6) | 88.17(7)   |

\* – chelating oxygen; \*\* – bridging oxygen

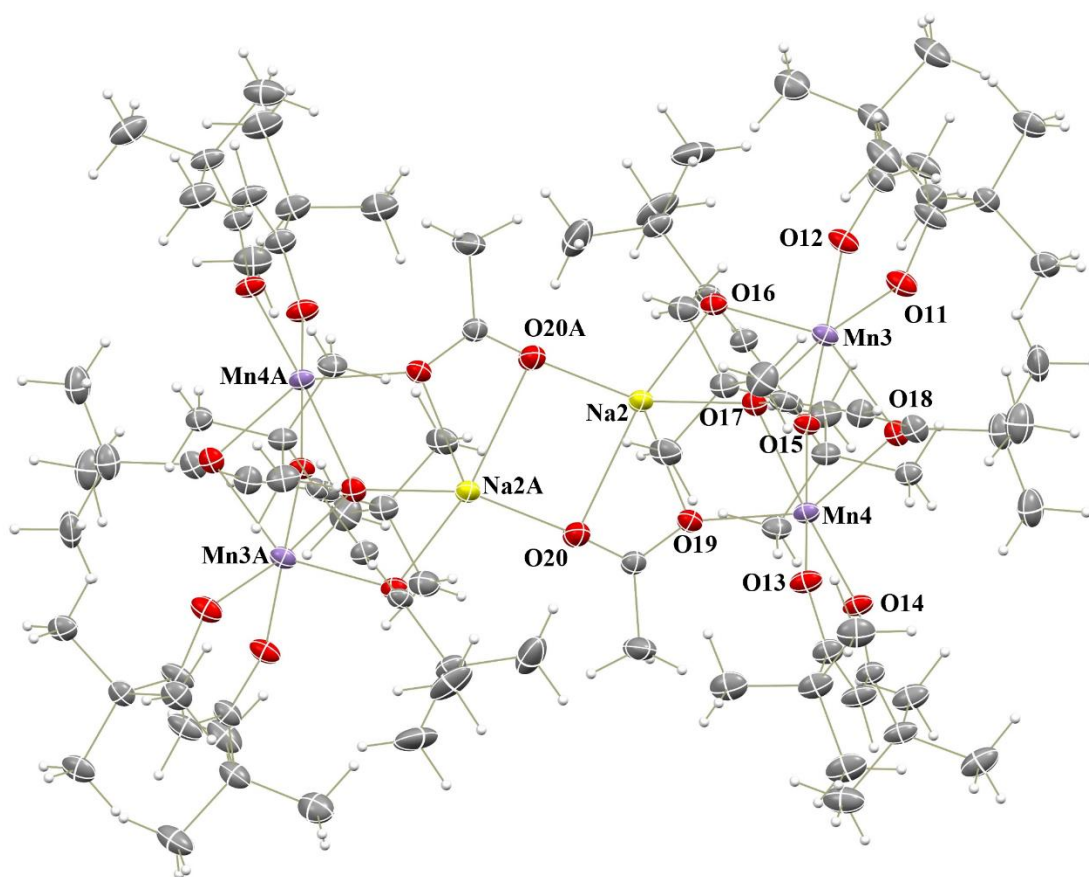

**Figure S2.** Molecular structure of the second crystallographically independent unit  $[\text{NaMn}_2(\text{thd})_4(\text{OAc})]_2$  (**1**). The Na, Mn, O, and C atoms are represented by thermal ellipsoids at the 30% probability level. Hydrogen atoms are shown as spheres of arbitrary radius.

**Table S2.** Bond Distances (Å) and Angles (°) in the Structure of the second crystallographically independent unit [NaMn<sub>2</sub>(thd)<sub>4</sub>(OAc)]<sub>2</sub> (**1**).

| Bond distances     |           |                   |            |                   |            |
|--------------------|-----------|-------------------|------------|-------------------|------------|
| Na(2)-O(16)**      | 2.352(2)  | Mn(3)-O(11)*      | 2.0672(18) | Mn(4)-O(13)*      | 2.0717(18) |
| Na(2)-O(17)**      | 2.320(2)  | Mn(3)-O(12)*      | 2.0469(19) | Mn(4)-O(14)*      | 2.0676(18) |
| Na(2)-O(19)**      | 2.348(2)  | Mn(3)-O(15)**     | 2.1708(18) | Mn(4)-O(15)**     | 2.1722(17) |
| Na(2)-O(20A)**     | 2.187(2)  | Mn(3)-O(16)**     | 2.1468(19) | Mn(4)-O(17)**     | 2.5456(18) |
| Na(2)-O(20)**      | 2.575(2)  | Mn(3)-O(17)**     | 2.2613(17) | Mn(4)-O(18)**     | 2.1914(19) |
|                    |           | Mn(3)-O(18)**     | 2.2096(19) | Mn(4)-O(19)**     | 2.0797(19) |
| Angles             |           |                   |            |                   |            |
| O(16)-Na(2)-O(20)  | 155.90(8) | O(11)-Mn(3)-O(15) | 87.99(7)   | O(13)-Mn(4)-O(15) | 170.30(7)  |
| O(17)-Na(2)-O(16)  | 77.87(7)  | O(11)-Mn(3)-O(16) | 103.63(8)  | O(13)-Mn(4)-O(18) | 96.91(7)   |
| O(17)-Na(2)-O(19)  | 80.52(7)  | O(11)-Mn(3)-O(17) | 172.13(8)  | O(13)-Mn(4)-O(19) | 98.27(8)   |
| O(17)-Na(2)-O(20)  | 107.68(7) | O(11)-Mn(3)-O(18) | 100.00(8)  | O(14)-Mn(4)-O(13) | 86.37(7)   |
| O(19)-Na(2)-O(16)  | 107.29(7) | O(12)-Mn(3)-O(11) | 86.27(7)   | O(14)-Mn(4)-O(15) | 102.40(7)  |
| O(19)-Na(2)-O(20)  | 52.58(7)  | O(12)-Mn(3)-O(15) | 172.79(7)  | O(14)-Mn(4)-O(18) | 108.74(8)  |
| O(20A)-Na(2)-O(16) | 113.18(8) | O(12)-Mn(3)-O(16) | 99.16(8)   | O(14)-Mn(4)-O(19) | 105.06(8)  |
| O(20A)-Na(2)-O(17) | 122.61(9) | O(12)-Mn(3)-O(17) | 96.01(7)   | O(15)-Mn(4)-O(18) | 76.49(7)   |
| O(20A)-Na(2)-O(19) | 136.47(8) | O(12)-Mn(3)-O(18) | 109.17(8)  | O(17)-Mn(4)-O(13) | 87.79(7)   |
| O(20A)-Na(2)-O(20) | 84.13(8)  | O(15)-Mn(3)-O(17) | 90.26(7)   | O(17)-Mn(4)-O(14) | 172.23(8)  |
|                    |           | O(15)-Mn(3)-O(18) | 76.14(7)   | O(17)-Mn(4)-O(15) | 83.10(7)   |
|                    |           | O(16)-Mn(3)-O(15) | 77.96(7)   | O(17)-Mn(4)-O(18) | 67.04(7)   |
|                    |           | O(16)-Mn(3)-O(17) | 83.49(7)   | O(17)-Mn(4)-O(19) | 80.72(7)   |
|                    |           | O(16)-Mn(3)-O(18) | 144.01(7)  | O(19)-Mn(4)-O(15) | 83.57(7)   |
|                    |           | O(18)-Mn(3)-O(17) | 72.14(7)   | O(19)-Mn(4)-O(18) | 143.62(7)  |

\* – chelating oxygen; \*\* – bridging oxygen

## 2. IR Spectrum of $[\text{NaMn}_2(\text{thd})_4(\text{OAc})_2]$

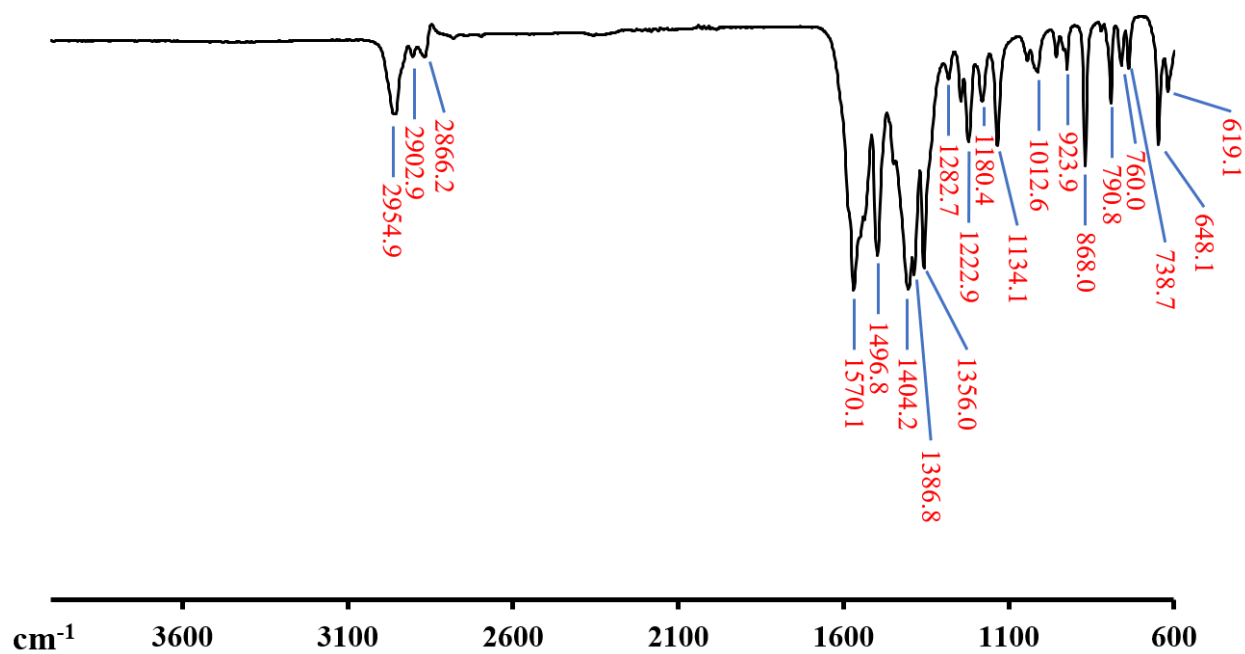

**Figure S3.** IR spectrum of  $[\text{NaMn}_2(\text{thd})_4(\text{OAc})_2]$  (**1**).

### 3. $^1\text{H}$ NMR Spectrum of $[\text{Na}(\text{thd})]$

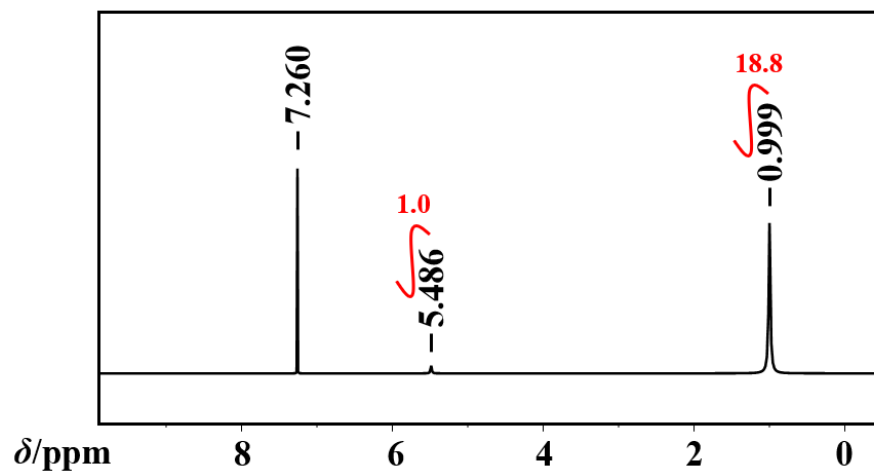

**Figure S4.**  $^1\text{H}$  NMR spectrum of  $[\text{Na}(\text{thd})]$  in  $\text{CDCl}_3$ .



#### 4. Direct Analysis in Real Time (DART) Mass Spectrum of [Na(thd)]

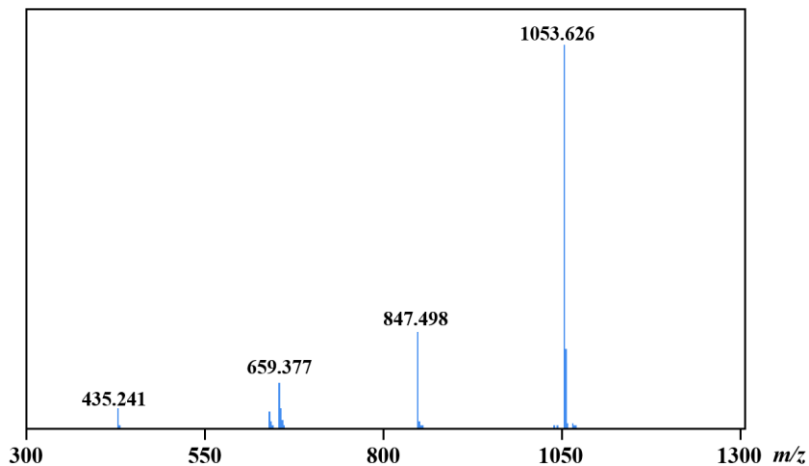

**Figure S5.** Positive-ion DART mass spectrum of [Na(thd)] measured at 350 °C.

**Table S3.** Assignment of ions detected in a positive-ion DART mass spectrum of [Na(thd)]. All ions having relative intensity higher than 3% are shown in the table.

| Fragments                                           | Calc. $m/z$ | Exp. $m/z$ | $\Delta$ | Relative Int. (%) |
|-----------------------------------------------------|-------------|------------|----------|-------------------|
| $[\text{Na}_6(\text{thd})_5]^+$                     | 1053.631    | 1053.626   | 0.005    | 100               |
| $[\text{Na}_5(\text{thd})_4]^+$                     | 847.503     | 847.498    | 0.005    | 24.9              |
| $[\text{Na}_4(\text{thd})_3(\text{H}_2\text{O})]^+$ | 659.385     | 659.377    | 0.008    | 15.7              |
| $[\text{Na}_4(\text{thd})_3]^+$                     | 641.375     | 641.370    | 0.005    | 4.3               |
| $[\text{Na}_3(\text{thd})_2]^+$                     | 435.246     | 435.241    | 0.005    | 5.1               |
